# Supplementary material
Source: MDPI journal article supplement (https://www.mdpi.com/2073-4433/15/3/380)
Supplement: s1 [file s1]

**Table S1: Meteorological data of Attica 1990-2019 (Source: Hellenic National Meteorological Service)**

[illegible]

|                                       |     |     |     |     |     |     |     |     |     |     |     |     |
|---------------------------------------|-----|-----|-----|-----|-----|-----|-----|-----|-----|-----|-----|-----|
| Monthly Average Wind Intensity<br>m/s | 6.3 | 6.4 | 6.1 | 5.4 | 5.5 | 6.1 | 7.5 | 7.5 | 6.4 | 6.1 | 4.9 | 5.6 |
| Lon: 23.56 Lat: 38.06 Alt: 20m        |     |     |     |     |     |     |     |     |     |     |     |     |
